# Supplementary material
Source: PubMed Central journal article supplement (PMC2800779)
Supplement: ddp470_1.pdf [file ddp470_1.pdf]

Supplementary Material  
Figure S1

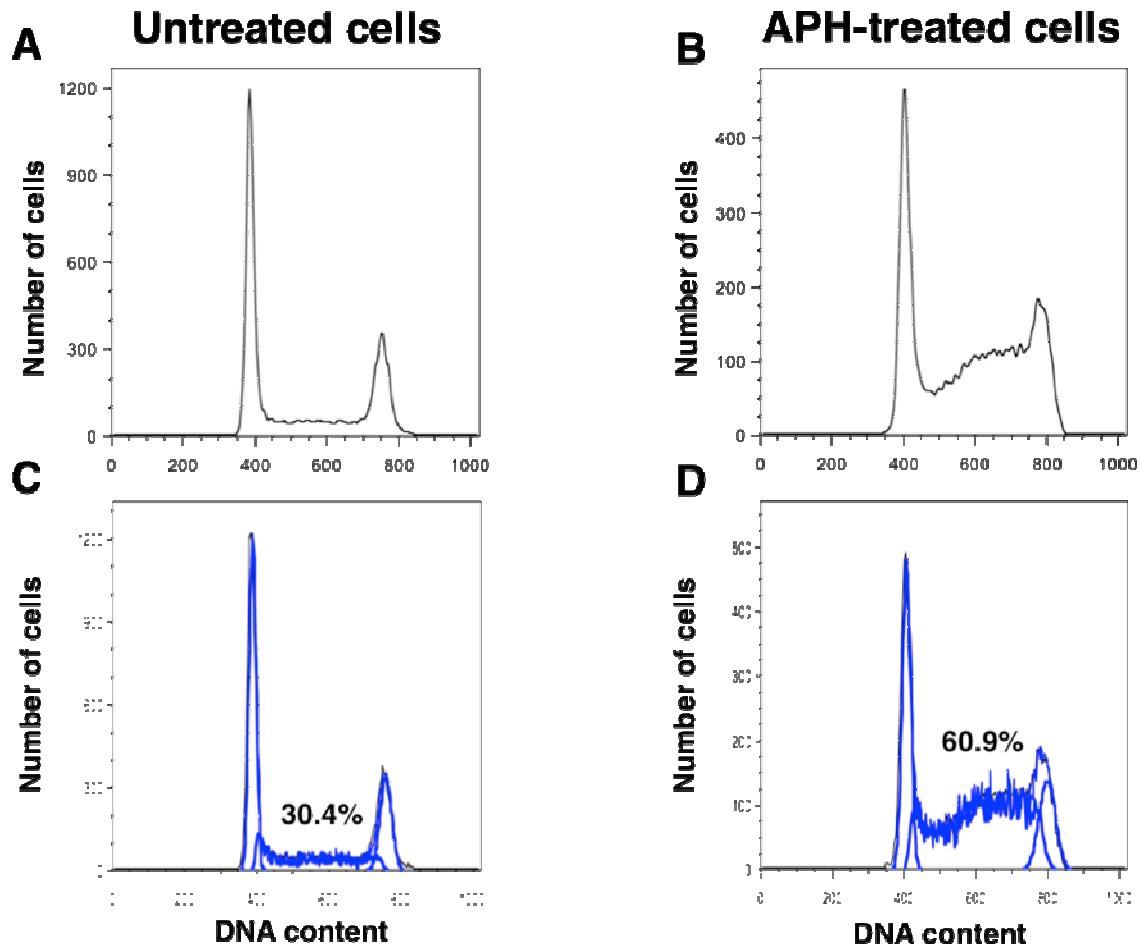

**Figure S1.** Estimation of the fraction of S phase cells in an asynchronous population of untreated or APH-treated cells

Representative cell cycle profile of (A) untreated and (B) APH-treated ( $0.4 \mu\text{M}$  for 24 h) asynchronous cells in log phase.

The percentage of cells in S phase obtained by applying a Watson Pragmatic model to the DNA content profiles is indicated for both (C) untreated and (D) APH-treated cells (the outline of the peaks used to calculate G1, S and G2 (blue) are superimposed on the cell cycle profile (black), FlowJo software).

Figure S2

(I) FRA3B ori 1

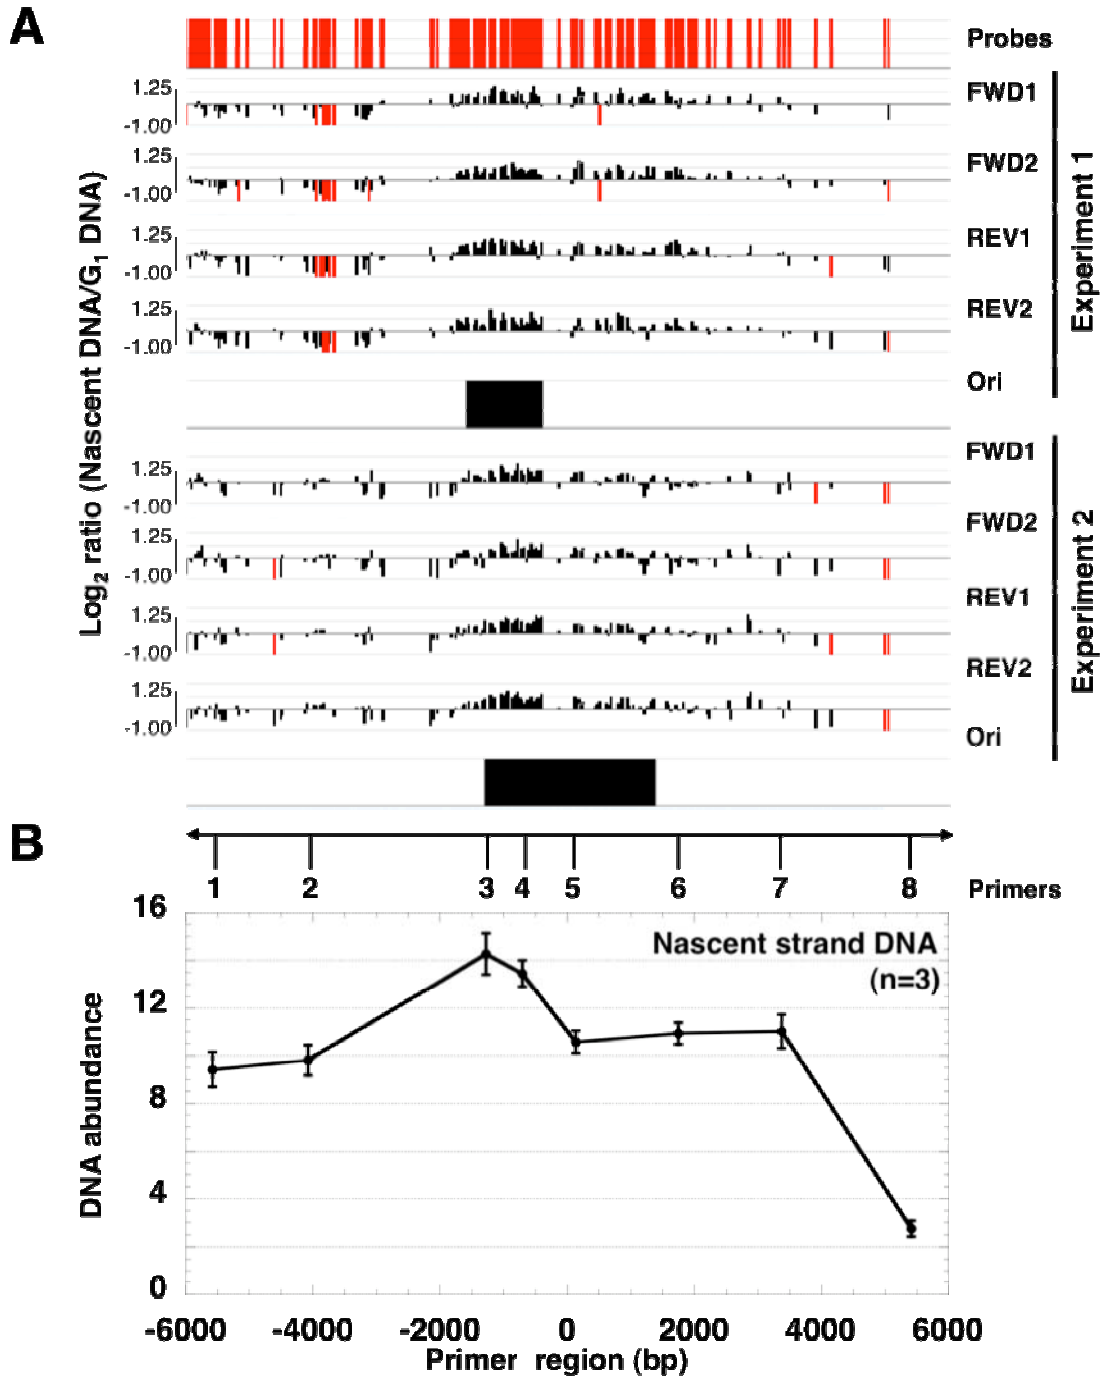

(II) MYC origin

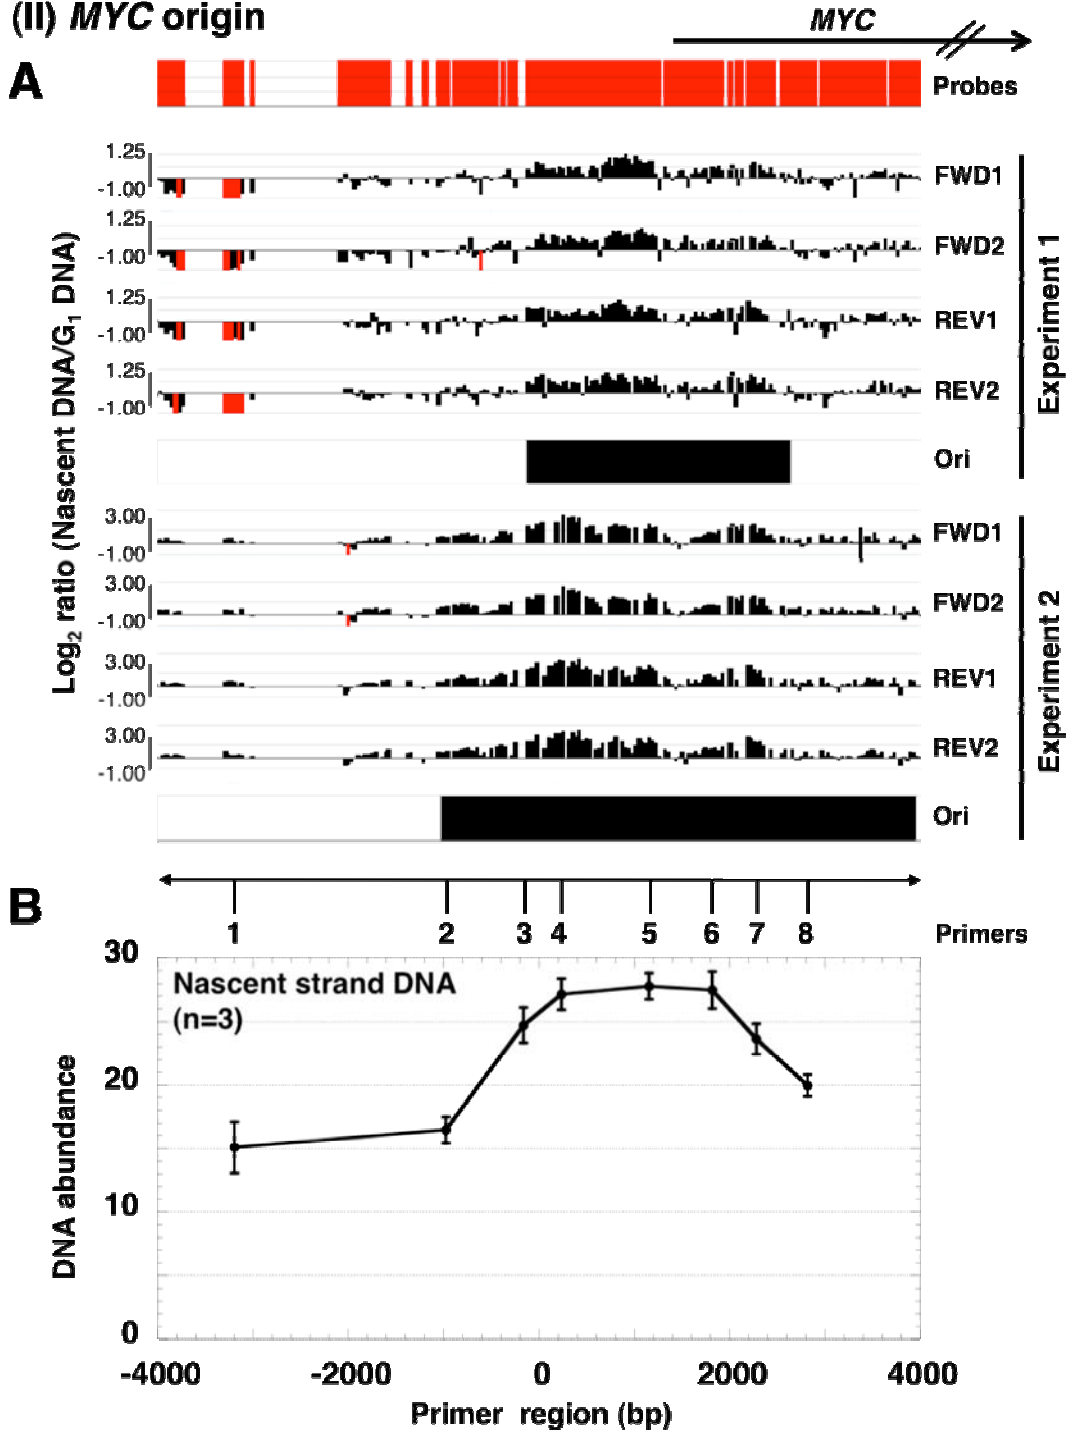

(III) *TBC1D10A* origin

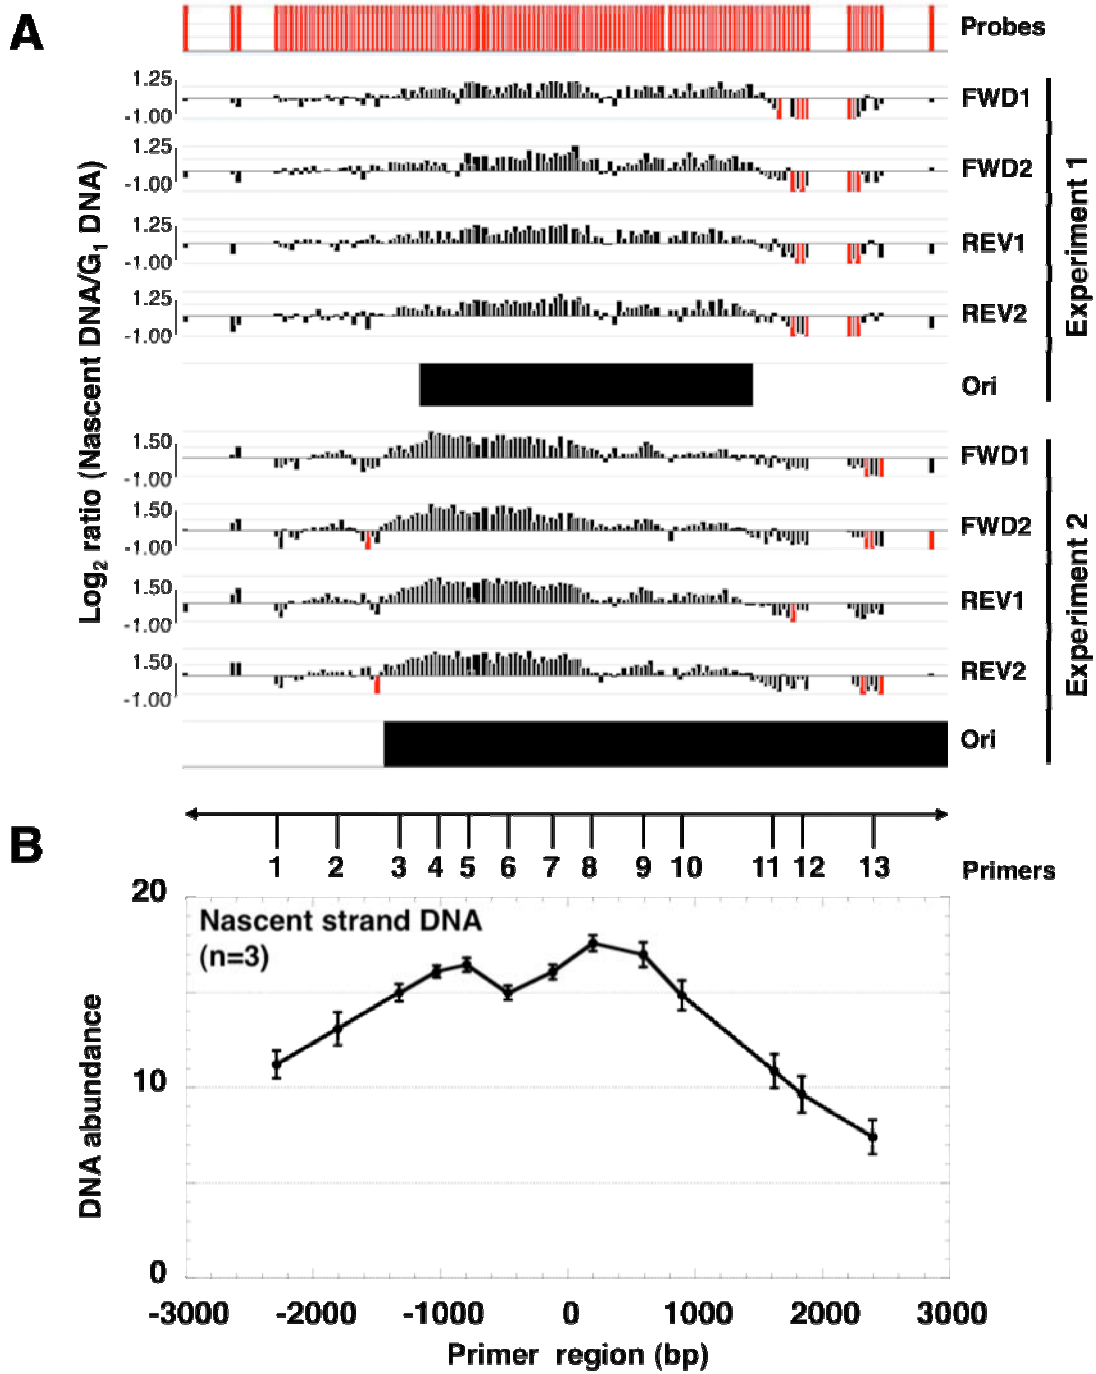

(IV) *RNF185* origin

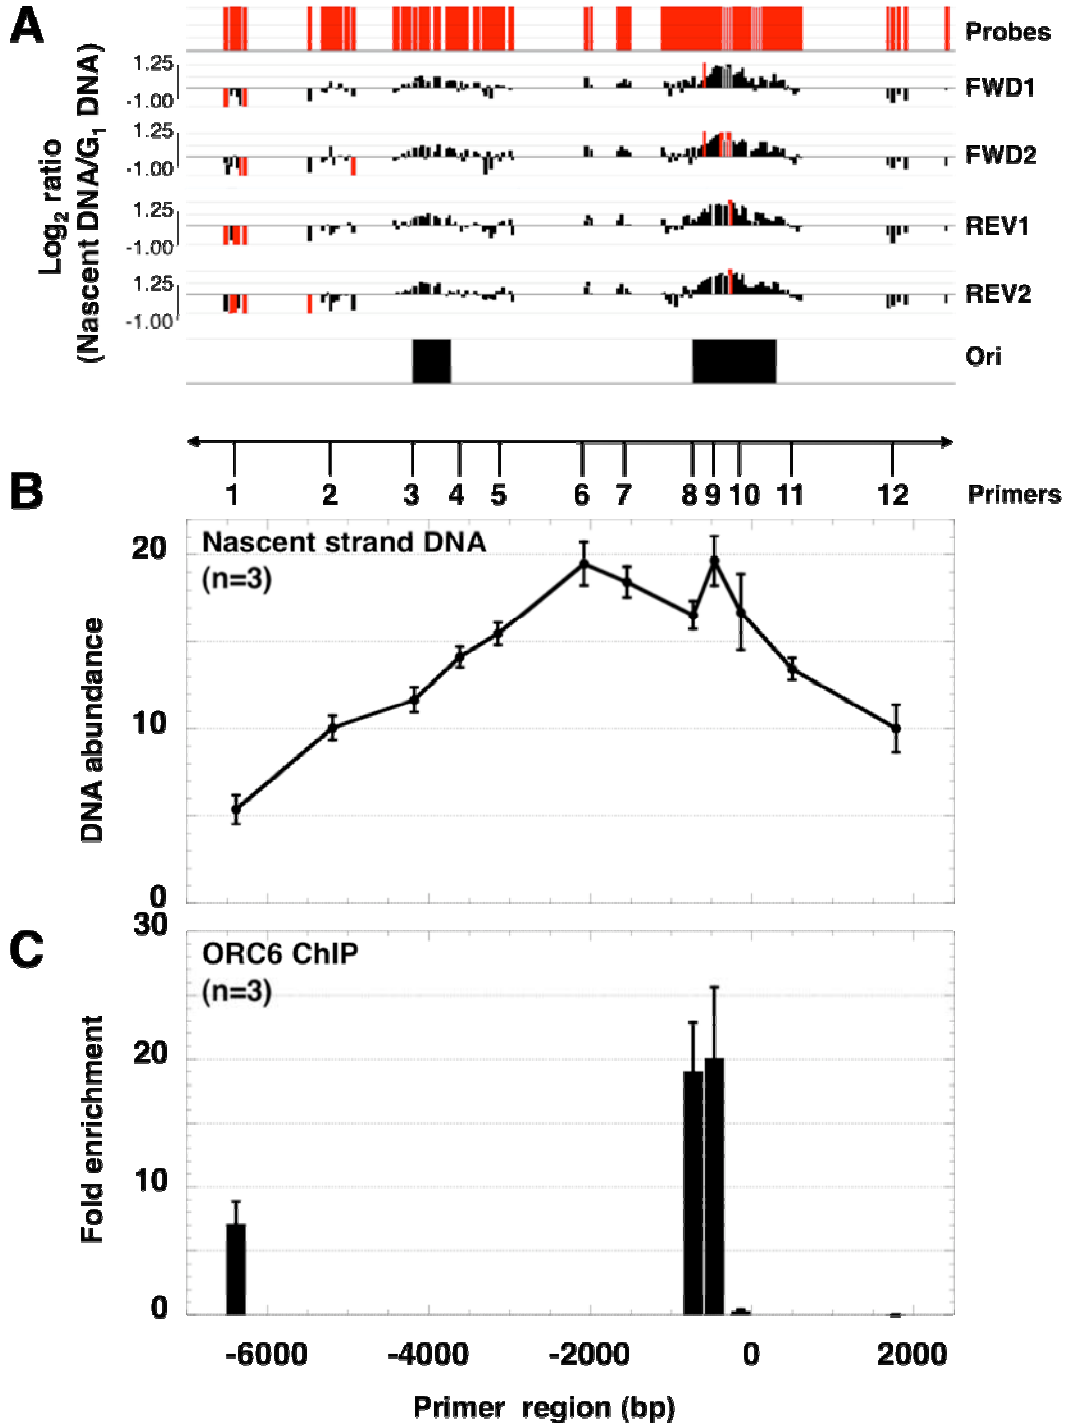

**Figure S2.** Detailed origin mapping for (I) FRA3B ori 1 and the three control origins within (II) *MYC*, (III) *TBC1D10A*, and (IV) *RNF185*.

(A) Microarray analysis of nascent strand DNA in untreated cells. The nascent strand DNA abundance data ( $\text{Log}_2$  ratio of nascent strand DNA signal over  $G_1$  DNA signal) obtained for each of the four sets of probes represented on the microarray (probes representing the forward and reverse strands are present in duplicate: FWD1, FWD2, REV1, REV2) for one or two independent experiments within a 6 to 12 kb region spanning (I) FRA3B ori 1, (II) *MYC*, (III) *TBC1D10A*, and (IV) *RNF185* origins. Real-time PCR quantification using closely-spaced primers (Supplementary Table 1) of (B) nascent strand DNA and (C, for the *RNF185* origin only) DNA immunoprecipitated with ORC6 antibody. The ChIP results are presented as the fold-enrichment over the value obtained using the primer 1 for FRA3B ori 2. Of note, the Real-time PCR results of both the nascent strand DNA and ChIP experiments plotted here correspond to the average and the standard error obtained for three independent experiments ( $n=3$ ). The *TBC1D10A* origin as defined by the peak finder in Experiment 2 extends farther than in Experiment 1 due to the presence of another origin centromeric of *TBC1D10A*. The two origins were merged in Experiment 2.



**Table S1.** Origins mapped by microarray within the 50kb region of FRA3B in untreated and APH-treated cells

| Origins      | Chromosome Coordinates (NCBI Build 35) |                                |                                                                  |
|--------------|----------------------------------------|--------------------------------|------------------------------------------------------------------|
|              | Untreated                              |                                | APH-treated                                                      |
|              | Exp 1                                  | Exp 2                          | Exp 2                                                            |
| <b>Ori 1</b> | 60 436 458 to<br>60 437 683 bp         | 60 436 741 to<br>60 439 454 bp | 60 436 420 to<br>60 437 623 bp                                   |
| <b>Ori 2</b> | 60 447 814 to<br>60 449 397 bp         | 60 447 920 to<br>60 450 770 bp | 60 448 159 to<br>60 450 770 bp                                   |
| <b>Ori 3</b> | 60 462 203 to<br>60 463 083 bp         | 60 462 343 to<br>60 463 289 bp | 60 462 704 to<br>60 463 264 bp                                   |
| <b>Ori 4</b> | 60 470 650 to<br>60 471 452 bp         | 60 466 935 to<br>60 471 294 bp | 60 466 440 to<br>60 467 821 bp<br>60 470 650 to<br>60 471 487 bp |



**Table S2.** Primers used for determining the nascent strand DNA abundance by Real-time PCR.

| Origin          | Primer name          | Primer sequence       | Start (bp)<br>NCBI<br>Build 35 | End (bp)<br>NCBI<br>Build 35 | Product<br>size<br>(bp) | Distance<br>to origin<br>center<br>(bp) |
|-----------------|----------------------|-----------------------|--------------------------------|------------------------------|-------------------------|-----------------------------------------|
| <i>MYC</i>      | 1F                   | CCCCATCAGACTGTTGACCT  | 128812849                      | 128812868                    | 156                     | -3193.5                                 |
|                 | 1R                   | TCTGACTAATTGCCCTTGC   | 128812985                      | 128813004                    |                         |                                         |
|                 | 2F                   | TCCCTTTTCCCAATAAATC   | 128815089                      | 128815108                    | 109                     | -977                                    |
|                 | 2R                   | AAACCCTAAAACGGCCAAAC  | 128815178                      | 128815197                    |                         |                                         |
|                 | 3F                   | GTGAGGGACCAAGGATGAGA  | 128815893                      | 128815912                    | 134                     | -160.5                                  |
|                 | 3R                   | CCCACACATGATTTGTTTGC  | 128816007                      | 128816026                    |                         |                                         |
|                 | 4F                   | GGGAAAGAGGACCTGGAAAG  | 128816285                      | 128816304                    | 143                     | 236                                     |
|                 | 4R                   | GGGACCGGACTTCCTAAAAG  | 128816408                      | 128816427                    |                         |                                         |
|                 | 5F                   | GAGCAGCAGAGAAAGGGAGA  | 128817218                      | 128817237                    | 117                     | 1156                                    |
|                 | 5R                   | CAGCCGAGCACTCTAGCTCT  | 128817315                      | 128817334                    |                         |                                         |
|                 | 6F                   | GCACTTTGCACTGGAAGCTT  | 128817878                      | 128817897                    | 120                     | 1817.5                                  |
|                 | 6R                   | CTTTCAGAGAAGCGGGTCCT  | 128817978                      | 128817997                    |                         |                                         |
|                 | 7F                   | GGTCGGACATTCCCTGCTTTA | 128818341                      | 128818360                    | 121                     | 2281                                    |
|                 | 7R                   | GATATGCGGTCCCTACTCCA  | 128818442                      | 128818461                    |                         |                                         |
| 8F              | AACAGCTGCTACCCTTGGTG | 128818886             | 128818905                      | 104                          | 2817.5                  |                                         |
| 8R              | TAATAGGGGCACCTCCCTTC | 128818970             | 128818989                      |                              |                         |                                         |
| <i>TBC1D10A</i> | 1F                   | GCTCAGCCTCAGCCTCTGTA  | 29038253                       | 29038272                     | 153                     | -2287                                   |
|                 | 1R                   | ACCTGATCTTGCCCTCACAG  | 29038386                       | 29038405                     |                         |                                         |
|                 | 2F                   | GAGGTCAAACAAGCCTCCAG  | 29038731                       | 29038750                     | 160                     | -1806                                   |
|                 | 2R                   | GAAGGATGCAAGGAGAACCA  | 29038871                       | 29038890                     |                         |                                         |
|                 | 3F                   | ACATGGCAGTCATGAACCAA  | 29039216                       | 29039235                     | 154                     | -1324                                   |
|                 | 3R                   | GACGGCATAAAGAGGAGCTG  | 29039350                       | 29039369                     |                         |                                         |
|                 | 4F                   | CCAACCCATTTCCCTAACCT  | 29039523                       | 29039542                     | 130                     | -1029                                   |
|                 | 4R                   | GCAGTCGTTTGAGCATGTGT  | 29039633                       | 29039652                     |                         |                                         |
|                 | 5F                   | CTGGCTGCTTTTTCCTCTGT  | 29039765                       | 29039784                     | 117                     | -793                                    |
|                 | 5R                   | GCACTCACAGACTTGCTGA   | 29039862                       | 29039881                     |                         |                                         |
|                 | 6F                   | AGCCTCTGAAGACCTGGACA  | 29040096                       | 29040115                     | 101                     | -470                                    |
|                 | 6R                   | TGCCAACTTTGGCTTTCTCT  | 29040177                       | 29040196                     |                         |                                         |
|                 | 7F                   | CAATGCATCCTGAGCCTGTA  | 29040448                       | 29040467                     | 101                     | -118                                    |
|                 | 7R                   | ACTGTCACCCAGTGCTCCTC  | 29040529                       | 29040548                     |                         |                                         |
|                 | 8F                   | GGTCAAGACCAATGCAATCC  | 29040730                       | 29040749                     | 169                     | 198                                     |
|                 | 8R                   | CTTCCAGTATGGAGGGCAGA  | 29040879                       | 29040898                     |                         |                                         |
|                 | 9F                   | CCCTCTCAGGGGAAGTAAGG  | 29041142                       | 29041161                     | 135                     | 593                                     |
| 9R              | GGAGCAGCTCGTGGTTCTAT | 29041257              | 29041276                       |                              |                         |                                         |
| 10F             | GTGAGGAGGGAGCACACAGT | 29041459              | 29041478                       | 106                          | 896                     |                                         |
| 10R             | CTGAAACAGGACCTCCCAAG | 29041545              | 29041564                       |                              |                         |                                         |
| 11F             | CAGATCCCTTGCTCCATAA  | 29042149              | 29042168                       | 176                          | 1621                    |                                         |
| 11R             | AGGTGGTCCCTGACCTTCTT | 29042305              | 29042324                       |                              |                         |                                         |

|                        |     |                      |          |          |     |         |
|------------------------|-----|----------------------|----------|----------|-----|---------|
|                        | 12F | CCCAACCACTTCCTCTATGC | 29042387 | 29042406 | 134 | 1838    |
|                        | 12R | CCAGGACCAGTTGAGGAAAA | 29042501 | 29042520 |     |         |
|                        | 13F | GGCAAGCTGCTTTCTTGTCT | 29042926 | 29042945 | 168 | 2394    |
|                        | 13R | AAACTGGAGGCCTGTGAGAA | 29043074 | 29043093 |     |         |
| <b>RNF185</b>          | 1F  | TGCCATTGGAAAGAACACAG | 29910458 | 29910477 | 193 | -6388   |
|                        | 1R  | ACGCTGTGGCTGAATACCTT | 29910631 | 29910650 |     |         |
|                        | 2F  | GGGAGGAATGGTCGTTGTTA | 29911697 | 29911716 | 103 | -5194   |
|                        | 2R  | GATCTCCACTGGCAAGTTCC | 29911780 | 29911799 |     |         |
|                        | 3F  | AAGGATGAGGACAGCCTGAA | 29912689 | 29912708 | 147 | -4180   |
|                        | 3R  | ATGGGGGCATTACATACAC  | 29912816 | 29912835 |     |         |
|                        | 4F  | TTCATCAGCTCTGGTTGCAC | 29913271 | 29913290 | 110 | -3616.5 |
|                        | 4R  | AGAAGGCTGTGGGGGTAAGT | 29913361 | 29913380 |     |         |
|                        | 5F  | GAAAGTCTCCCTGGTCGTCA | 29913737 | 29913756 | 119 | -3146   |
|                        | 5R  | CACCTTCTTTCTCCATCCA  | 29913836 | 29913855 |     |         |
|                        | 6F  | GAGAAACCCAAAACGGGATT | 29914775 | 29914794 | 175 | -2080   |
|                        | 6R  | ATCCCAGGCATCAGAATCAG | 29914930 | 29914949 |     |         |
|                        | 7F  | CTACTGGGAAGGTGGGGATT | 29915330 | 29915349 | 129 | -1548   |
|                        | 7R  | TCTAGGGCCTCCTAGCAACA | 29915439 | 29915458 |     |         |
|                        | 8F  | CTTCTCCCCTTGATGTGAA  | 29916151 | 29916170 | 125 | -729    |
|                        | 8R  | CCTCCCCTCCTAGCTGACTC | 29916256 | 29916275 |     |         |
|                        | 9F  | ATGTAGCAGGAGAGGCTCCA | 29916389 | 29916408 | 172 | -467.5  |
|                        | 9R  | AGACCATGAAGGGCTCTCAA | 29916541 | 29916560 |     |         |
|                        | 10F | CCCAGTCCTGCTCAAGCTAC | 29916714 | 29916733 | 180 | -138.5  |
|                        | 10R | TCATGGTTTCAAGGGGGATA | 29916874 | 29916893 |     |         |
|                        | 11F | CCCTGACCCTGTTGGTAAAG | 29917384 | 29917403 | 110 | 496.5   |
|                        | 11R | CGAGGAGGGGTCTTCTCTCT | 29917474 | 29917493 |     |         |
|                        | 12F | ATTTACCCACCATTGCCAAG | 29918591 | 29918610 | 146 | 1721.5  |
|                        | 12R | ATCATGGAAAACCTGCCAAA | 29918717 | 29918736 |     |         |
| <b>FRA3B<br/>ori 1</b> | 1F  | CACCCACCTGGTCTTTTGTT | 60432453 | 60432472 | 123 | -5578   |
|                        | 1R  | GGGGAAGACAGAGCAAGATG | 60432556 | 60432575 |     |         |
|                        | 2F  | CTGCTCTCAAGGTGTTGCTG | 60433949 | 60433968 | 139 | -4074   |
|                        | 2R  | TCTTGGAACAGTGCTCATGC | 60434068 | 60434087 |     |         |
|                        | 3F  | TTGGCACAAGAAGTGGCATA | 60436753 | 60436772 | 127 | -1276   |
|                        | 3R  | TGCACAGCCATCAGTTTTTC | 60436860 | 60436879 |     |         |
|                        | 4F  | ATCAGCTGGGAGCACTGACT | 60437325 | 60437344 | 128 | -704    |
|                        | 4R  | TCCCTAGGCCCTTGAACCTT | 60437433 | 60437452 |     |         |
|                        | 5F  | TATGCCTGCCTTTGGATTC  | 60438175 | 60438194 | 104 | 135     |
|                        | 5R  | GTGATGCCTGGCAAGAGAGT | 60438259 | 60438278 |     |         |
|                        | 6F  | TCTAAGTTGCCAGGACAG   | 60439773 | 60439792 | 137 | 1749    |
|                        | 6R  | GAAAGGCACGTCTGAACCAT | 60439890 | 60439909 |     |         |
|                        | 7F  | GCCAAAATAAGGGGACACA  | 60441377 | 60441396 | 175 | 3372    |
|                        | 7R  | CCCTGCAGAGTCAGAGAGGT | 60441532 | 60441551 |     |         |
|                        | 8F  | AATCTCCGGGACACAGAGTG | 60443427 | 60443446 | 153 | 5411    |
|                        | 8R  | TCTGCTGGCTTTTGGATTTT | 60443560 | 60443579 |     |         |

|                        |              |                                 |           |           |      |         |
|------------------------|--------------|---------------------------------|-----------|-----------|------|---------|
| <b>FRA3B<br/>ori 2</b> | 1F           | TTGGCTATACAGAGGTCTTCAT<br>AGATT | 60445108  | 60445134  | 119  | -3568.5 |
|                        | 1R           | GAAATAAGAGAAAACAAATTG<br>GACAAC | 60444940  | 60444966  |      |         |
|                        | 2F           | TTCCTATTAGAGTGGACAGCAT<br>AGATT | 60446876  | 60446902  | -100 | -1780   |
|                        | 2R           | AACAGTTTCCCTATCAATAGTC<br>ATTTG | 60446749  | 60446775  |      |         |
|                        | 3F           | TGAACAATTCCCCAAAGCTC            | 60447209  | 60447228  | 115  | -1339.5 |
|                        | 3R           | TGCAATGCTTTCTTTGCCTA            | 60447304  | 60447323  |      |         |
|                        | 4F           | CTAAGCAACCCTGCCACAAG            | 60447745  | 60447764  | 117  | -802.5  |
|                        | 4R           | CCCAAAGAGATCAGCCAAGA            | 60447842  | 60447861  |      |         |
|                        | 5F           | TTTCTCCAGCCAAAGCAAAT            | 60448678  | 60448697  | 111  | 127.5   |
|                        | 5R           | TGGCTTCACAGATGGTCTTG            | 60448769  | 60448788  |      |         |
|                        | 6F           | GCAGGGTAGGGGATATTCTCA           | 60449364  | 60449384  | 147  | 831.5   |
|                        | 6R           | TGCCTGAATATAGGGCTTGG            | 60449491  | 60449510  |      |         |
|                        | 7F           | CAATTCACAGAGGTGGCAA             | 60450032  | 60450051  | 112  | 1482    |
|                        | 7R           | GCCAGGATTTTGTGCTTTC             | 60450124  | 60450143  |      |         |
|                        | 8F           | CTGAACAGGAGGCTCCAAAC            | 60450646  | 60450665  | 108  | 2094    |
|                        | 8R           | TTCCTGCCTGTCATGTGCGTA           | 60450734  | 60450753  |      |         |
|                        | 9F           | AAGGCCAACCAGAACAAAAA            | 60452201  | 60452220  | 107  | 3648.5  |
|                        | 9R           | TCTGGCTGTGGCTGAAGATA            | 60452288  | 60452307  |      |         |
| <b>FRA3B<br/>ori 3</b> | 1F           | GGTCAGCTGGCTGAAATCAT            | 60461594  | 60461613  | 132  | -984    |
|                        | 1R           | GAATATGTGCCAAGCCCTGT            | 60461706  | 60461725  |      |         |
|                        | 2F           | ATTTACGCCAGCTCTTCAA             | 60462208  | 60462227  | 155  | -358    |
|                        | 2R           | AGCCAGGAAGTGGAAC TCAA           | 60462343  | 60462362  |      |         |
|                        | 3F           | GGCGGTTCTTTGATAAGCAG            | 60462704  | 60462723  | 134  | 128     |
|                        | 3R           | TGACAACCTAGACCCCCTTG            | 60462818  | 60462837  |      |         |
|                        | 4F           | CAGCAGCCTGGGAAAGATTA            | 60463016  | 60463035  | 130  | 438     |
|                        | 4R           | GACAGCTCCTTGAGACAGG             | 60463126  | 60463145  |      |         |
|                        | 5F           | TTTTCTTGCGGGTTTAGGTC            | 60463261  | 60463280  | 105  | 670     |
|                        | 5R           | TGATGCCTGACATTATTGTGCT          | 60463344  | 60463365  |      |         |
|                        | 6F           | TGTAGTCATGAGGGCTGACG            | 60463492  | 60463511  | 141  | 919     |
|                        | 6R           | CCATCTTCCTTTCTGCCATT            | 60463613  | 60463632  |      |         |
|                        | 7F           | GCCTATGATAGCAAAGATGC            | 60464197  | 60464216  | 151  | 1629    |
|                        | 7R           | AGAAGTCATGCCACAACCAA            | 60464327  | 60464346  |      |         |
|                        | 8F           | CCAGATTATATCACAAAGTGACG         | 60464768  | 60464790  | 145  | 2196    |
|                        | 8R           | TGTGACTGACATTGGTGGCTA           | 60464890  | 60464910  |      |         |
| <b>Chr22</b>           | R1_1_F       | ATGGGGTAATGGGACAACCT            | 29185290  | 29185309  | 141  | NA      |
|                        | R1_1_R       | CCTGTGGGCTACAACCTCAT            | 29185411  | 29185430  |      |         |
|                        | R1_2_F       | TTCCAGTGTCTGTCCTGCAC            | 29185554  | 29185573  | 128  | NA      |
|                        | R1_2_R       | GGTTTGTGGCTGAATGGTT             | 29185662  | 29185681  |      |         |
| <b>FRAXA</b>           | FRAXA_R1_1_F | TAAATTTGGGGATCGTCAGC            | 146825195 | 146825214 | 128  | NA      |
|                        | FRAXA_R1_1_R | TGCTGGCTTTCTCTCTTTC             | 146825303 | 146825322 |      |         |

The primers were designed to meet universal conditions (60<sup>0</sup>C, no extra MgCl<sub>2</sub> added to the ABI Fast SYBR Real-time PCR mix).

The shaded rows indicate the non-origin region primers used for normalizing the nascent strand DNA abundance between untreated and APH-treated samples at the *MYC*, *TBC1D10A*, *RNF185*, and *FRA3B* origins in Figures 5 and 6.

**Table S3.** Primers used for the timing of origin firing at the *MYC*, *FRA3B*, *FRAXA*, and *RNF185* loci by Real-time PCR.

| Region                       | Primer name        | Primer sequence      | Start (bp) NCBI Build 35 | End (bp) NCBI Build 35 | Mg (mM) | Temp |
|------------------------------|--------------------|----------------------|--------------------------|------------------------|---------|------|
| <i>MYC</i> (ori)             | 5.5F               | TACAGACTGGCAGAGAGCAG | 128816612                | 128816631              | 2       | 60   |
|                              | 5.5R               | ATGTATGCACAGCTATCTGG | 128816805                | 128816824              |         |      |
| <i>MYC</i> (non-ori)         | 0F                 | GAGTTGGCAACCCTTGATGT | 128808885                | 128808904              | 2       | 58   |
|                              | 0R                 | GTTAGGATTTCCCGCCTTTC | 128809139                | 128809158              |         |      |
| <b>FRA3B ori 1 (ori)</b>     | 3.5F               | TTTAGGATACCTCCAAAGGG | 60447273                 | 60447292               | 4       | 60   |
|                              | 3.5R               | GGAGAAGTGTTTTGGCTTTG | 60447477                 | 60447496               |         |      |
| <b>FRA3B ori 1 (non-ori)</b> | 0F                 | TCACCACTGACACCACAGAA | 60443771                 | 60443790               | 2.5     | 61   |
|                              | 0R                 | GACACCAGTTCCTCTTTGTA | 60444022                 | 60444041               |         |      |
| <b>FRAXA (ori)</b>           | <b>FRAXA-ori-f</b> | AGGTCTCCTTTGGCTTCTCT | 146699760                | 146699779              | 2       | 63   |
|                              | <b>FRAXA-ori-r</b> | ATGGTTTTAGACGCTGAAGC | 146700045                | 146700064              |         |      |
| <b>FRAXA (non-ori)</b>       | <b>FRAXA-neg-f</b> | GAGCAGTGGTTCCTGTTGGT | 146704269                | 146704288              | 4       | 68   |
|                              | <b>FRAXA-neg-r</b> | CTAGCAACTGGGCCAAAGAG | 146704450                | 146704469              |         |      |
| <i>RNF185</i> (ori)          | 9.5F               | CAGGATCTGGGTGACTTTGT | 29916460                 | 29916479               | 3       | 63   |
|                              | 9.5R               | AGAAGTTAGAGGAGCAGGTG | 29916745                 | 29916764               |         |      |
| <i>RNF185</i> (non-ori)      | 0F                 | TCACAGCACTCTGGATGAGG | 29908640                 | 29908659               | 2       | 62   |
|                              | 0R                 | TAGGGCAAGAGCCTCAAGAA | 29908876                 | 29908895               |         |      |

**Table S4.** Real-time quantification using the primer pairs representing the origin region and a non-origin region

| Time after release (h) |         | 0          | 2          | 4             | 6             | 8          |
|------------------------|---------|------------|------------|---------------|---------------|------------|
| <i>MYC</i>             | ori     | 0.2 ± 0.01 | 1.2 ± 0.04 | 6.9 ± 0.00    | 1.7 ± 0.00    | 0.1 ± 0.01 |
|                        | non-ori | 0.1 ± 0.02 | 0.3 ± 0.02 | 8.5 ± 0.19    | 1.9 ± 0.06    | 0.1 ± 0.00 |
| <i>RNF185</i>          | ori     | 1.2 ± 0.08 | 7.5 ± 0.09 | 323.4 ± 13.18 | 75.9 ± 5.75   | 0.3 ± 0.10 |
|                        | non-ori | 0.1 ± 0.01 | 0.5 ± 0.01 | 14.6 ± 1.31   | 3.0 ± 0.27    | 0.0 ± 0.00 |
| <i>FRAXA</i>           | ori     | 2.4 ± 0.74 | 9.0 ± 4.63 | 464.5 ± 97.37 | 134.5 ± 37.74 | 0.1 ± 0.01 |
|                        | non-ori | 0.2 ± 0.03 | 0.8 ± 0.05 | 19.3 ± 2.43   | 5.4 ± 0.15    | 0.0 ± 0.01 |
| <i>FRA3B</i><br>ori 2  | ori     | 0.1 ± 0.00 | 0.7 ± 0.28 | 68.8 ± 5.61   | 12.7 ± 0.61   | 0.0 ± 0.00 |
|                        | non-ori | 0.1 ± 0.02 | 0.3 ± 0.08 | 6.3 ± 0.08    | 2.3 ± 0.21    | 0.0 ± 0.00 |

The average and the standard deviation of the nascent strand DNA quantification performed in triplicate are indicated for each primer set.
